# Supplementary material
Source: MDPI journal article supplement (https://www.mdpi.com/2073-4441/14/7/1070)
Supplement: s1 [file s1]

**Table S1.** Potential Precipitates at Each Sampling Point (Top 5).

| <b>Run</b>   | <b>Sampling Point</b> | <b>Precipitates (Arranged from Highest to Lowest SI)</b>                                                   |
|--------------|-----------------------|------------------------------------------------------------------------------------------------------------|
| 1 (CW-L-LMW) | 2                     | magnetite, cuprous ferrite, aluminum hydroxide sulfide, cupric ferrite, hematite                           |
|              | 3                     | magnetite, cuprous ferrite, cupric ferrite, hematite, aluminum hydroxide sulfate                           |
|              | 4                     | magnetite, cuprous ferrite, cupric ferrite, hematite, hercynite                                            |
| 2 (CW-LMW-L) | 2                     | magnetite, cuprous ferrite, cupric ferrite, aluminum hydroxide sulfate, hematite                           |
|              | 3                     |                                                                                                            |
|              | 4                     |                                                                                                            |
| 3 (L-CW-LMW) | 2                     | magnetite, aluminum hydroxide sulfide, cuprous ferrite, cupric ferrite, hematite                           |
|              | 3                     | magnetite, cuprous ferrite, cupric ferrite, hematite, hercynite                                            |
|              | 4                     | magnetite, cuprous ferrite, cupric ferrite, aluminum hydroxide sulfate, aluminum oxide, aluminum hydroxide |
| 4 (L-LMW-CW) | 2                     | cuprous ferrite, magnetite, aluminum hydroxide sulfate, hematite, cupric ferrite                           |
|              | 3                     |                                                                                                            |
|              | 4                     |                                                                                                            |
| 5 (LMW-CW-L) | 2                     | cuprous ferrite                                                                                            |
|              | 3                     | magnetite, cupric ferrite, cuprous ferrite, hematite, hercynite                                            |
|              | 4                     | magnetite, cupric ferrite, cuprous ferrite, hematite, hausmanite                                           |
| 6 (LMW-L-CW) | 2                     | cuprous ferrite, hematite                                                                                  |
|              | 3                     | magnetite, cupric ferrite, cuprous ferrite, hematite, hercynite                                            |
|              | 4                     | magnetite, cupric ferrite, cuprous ferrite, maghemite, hematite                                            |
